# Supplementary material for: 3D-printed monolithic biofilters based on a polylactic acid (PLA) – hydroxyapatite (HAp) composite for heavy metal removal from an aqueous medium
Source: Royal Society of Chemistry journal article supplement (doi:10.1039/d1ra05202k), 2021-01-01
Supplement: d1ra05202k1.pdf [file d1ra05202k1.pdf]

## Supplementary information

### **3D-printed monolithic biofilters based on polylactic acid (PLA) - hydroxyapatite (HAp) composite for heavy metal removal from aqueous medium**

*Natalia Fijol<sup>a</sup>, Hani Nasser Abdelhamid<sup>a,b</sup>, Binsi Pillai<sup>c</sup>, Stephen A. Hall<sup>d</sup>, Nebu Thomas<sup>f</sup> and Aji  
P. Mathew<sup>a,\*</sup>*

<sup>a</sup>Department of Materials and Environmental Chemistry, Stockholm University, Frescativägen 8,  
106 91, Stockholm, Sweden

<sup>b</sup>Advanced Multifunctional Materials Laboratory, Department of Chemistry, Faculty of Science,  
Assiut University, Assiut 71515, Egypt

<sup>c</sup>ICAR-Central Institute of Fisheries Technology, Matsyapuri, Willington Island, Cochin, India –  
682 029

<sup>d</sup>Division of Solid Mechanics, Lund University, Lund Sweden

<sup>e</sup>Lund Institute of Advanced Neutron and X-ray Science, Lund Sweden

<sup>f</sup>Department of Periodontology, Pushpagiri College Of Dental Sciences, Thiruvalla, Kerala, India

Correspondence to:

\*Aji P Mathew

E-mail and phone: [aji.mathew@mmk.su.se](mailto:aji.mathew@mmk.su.se); +46 8161256

Address: Department of Materials and Environmental Chemistry, Stockholm University,  
Frescativägen 8, 106 91, Stockholm, Sweden

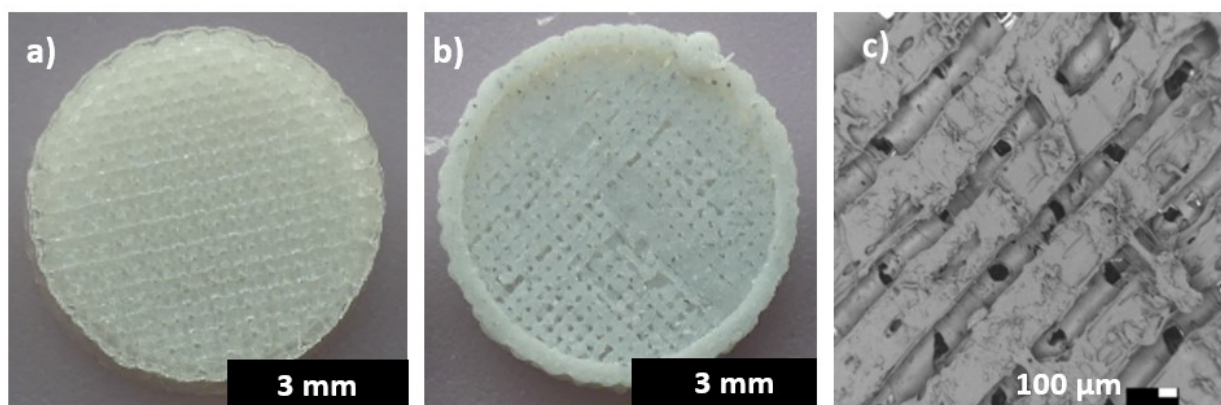

**Figure S1.** Disc-shapes models for ion adsorption study a) PLA, b) HAp/PLA, c) SEM porosity structure measurement

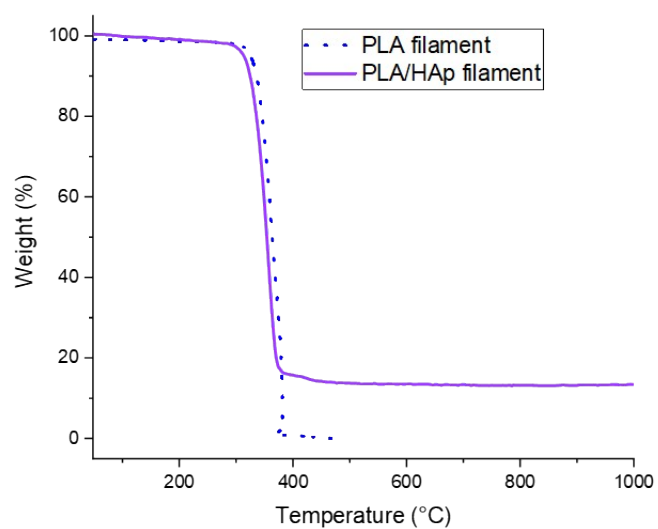

**Figure S2.** Thermal stability of the PLA and PLA/HAp 3D printing filaments

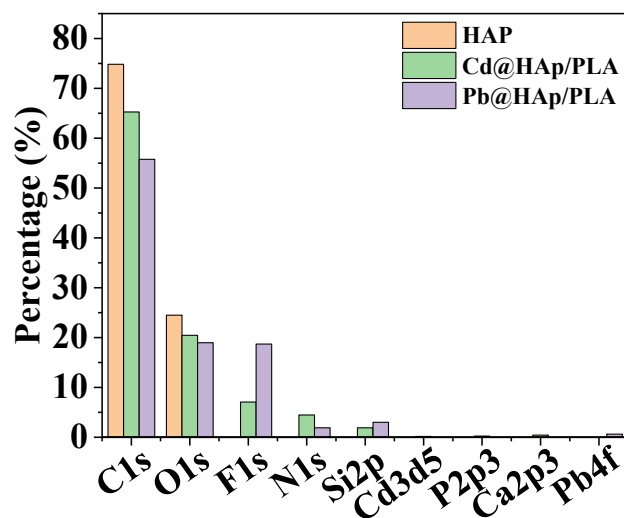

**Figure S3** Elemental composition using XPS data.

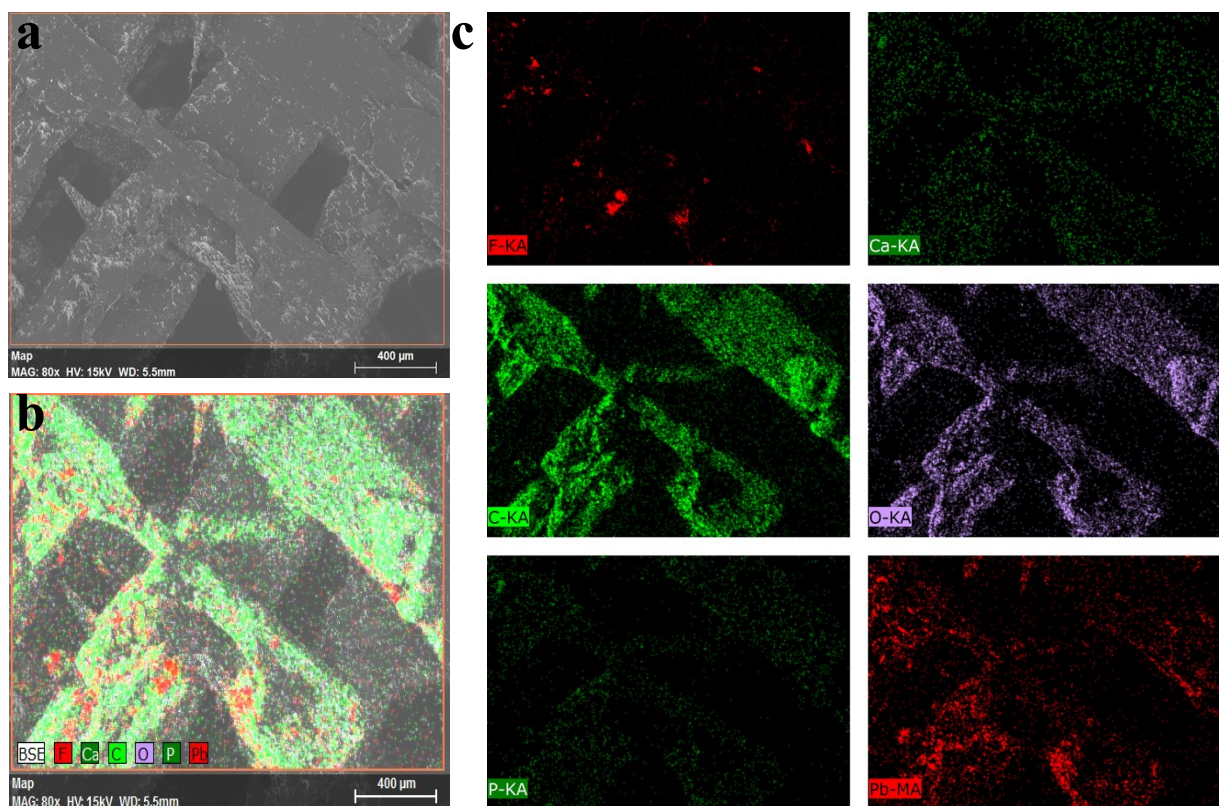

**Figure S4** Characterization of Pb adsorbed into HAp/PLA using a) SEM image, b) EDX mapping and c) elemental mapping.

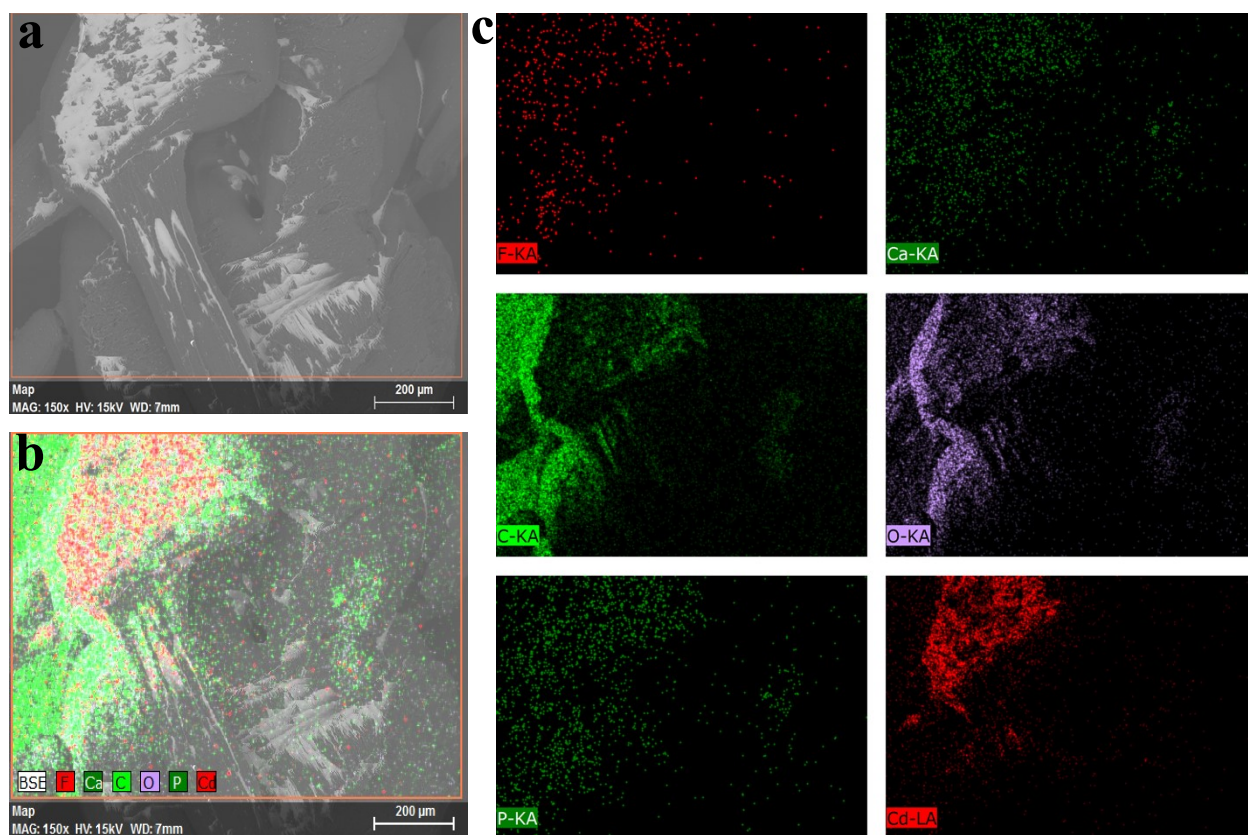

**Figure S5** Characterization of Cd adsorbed into HAp/PLA using a) SEM image, b) EDX mapping and c) elemental mapping.
